# Supplementary material for: Measuring Marriage and Cohabitation: Assessing Same-Sex Relationship Status in the Current Population Survey
Source: Oxford University Press journal article supplement (doi:10.1215/00703370-9162213), 2021-04-16
Supplement: manning_esm.pdf [file manning_esm.pdf]

## ONLINE APPENDIX

Figure A1. CPS Sample Rotation Cycles for Calendar Years 2015 and 2016

| Calendar Month | Month -In-Sample, 2015 | Month -In-Sample, 2016 |
|----------------|------------------------|------------------------|
| January        | 1 2 3 4 5 6 7 8        | 1 2 3 4 5 6 7 8        |
| February       | 1 2 3 4 5 6 7 8        | 1 2 3 4 5 6 7 8        |
| <b>March</b>   | <b>1 2 3 4 5 6 7 8</b> | <b>1 2 3 4 5 6 7 8</b> |
| April          | 1 2 3 4 5 6 7 8        | 1 2 3 4 5 6 7 8        |
| May            | 1 2 3 4 5 6 7 8        | 1 2 3 4 5 6 7 8        |
| June           | 1 2 3 4 5 6 7 8        | 1 2 3 4 5 6 7 8        |
| July           | 1 2 3 4 5 6 7 8        | 1 2 3 4 5 6 7 8        |
| August         | 1 2 3 4 5 6 7 8        | 1 2 3 4 5 6 7 8        |
| September      | 1 2 3 4 5 6 7 8        | 1 2 3 4 5 6 7 8        |
| October        | 1 2 3 4 5 6 7 8        | 1 2 3 4 5 6 7 8        |
| November       | 1 2 3 4 5 6 7 8        | 1 2 3 4 5 6 7 8        |
| December       | 1 2 3 4 5 6 7 8        | 1 2 3 4 5 6 7 8        |

### Legend

 Month-in-sample household received NEW roster response categories

*Note:* Shaded numbers indicate the month-in-sample for those households receiving the NEW roster categories. Care should be taken when pooling interview years because the CPS sampling methodology involves interviews of each sample household once a month for four consecutive months in 1 year and then again, for the same months a year later. When we pool CPS years, we limit analysis to the months that were not repeated to ensure a household only appears once in the file. For these analyses, all data used (regardless of a households' month-in-sample) were collected in March when the CPS ASEC supplement is administered. The months within the two boxes are those included in our first pooled sample, representing respondents who received the old roster response categories.
